# Supplementary material
Source: PubMed Central journal article supplement (PMC5289863)
Supplement: 967FigureS2.pdf [file 967FigureS2.pdf]

1. Smiling

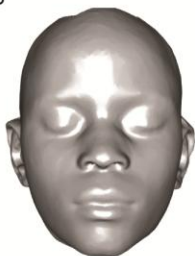

Mean

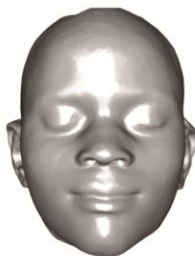

Positive Extreme

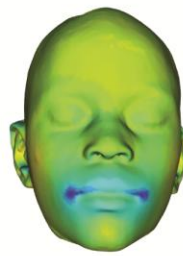

Heatmap

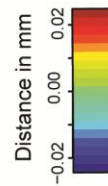

2. Nasal Bump

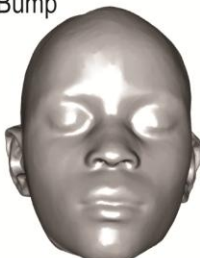

Mean

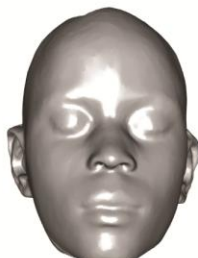

Positive Extreme

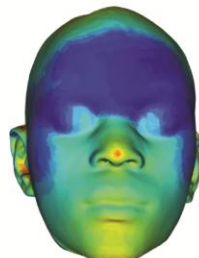

Heatmap

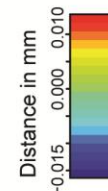

3. Nasal Flatness

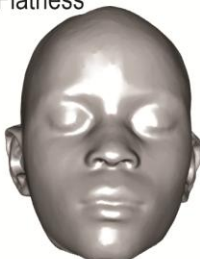

Mean

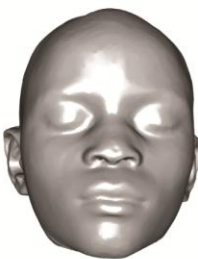

Positive Extreme

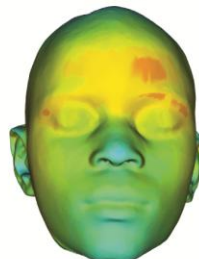

Heatmap

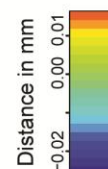

4. Lateral Nasal Deformity - Right

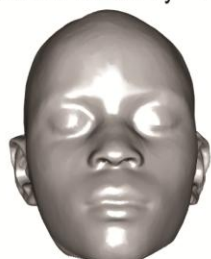

Mean

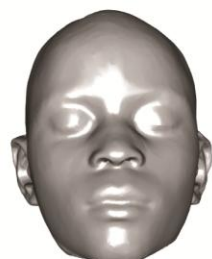

Positive Extreme

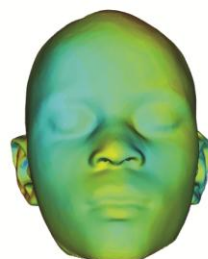

Heatmap

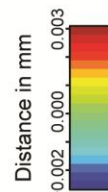

5. Lateral Nasal Deformity - Left

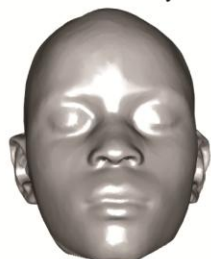

Mean

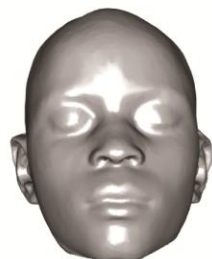

Positive Extreme

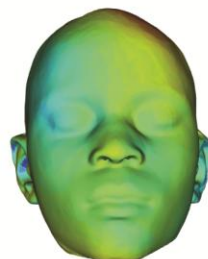

Heatmap

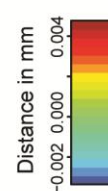

6. Excessive Seams

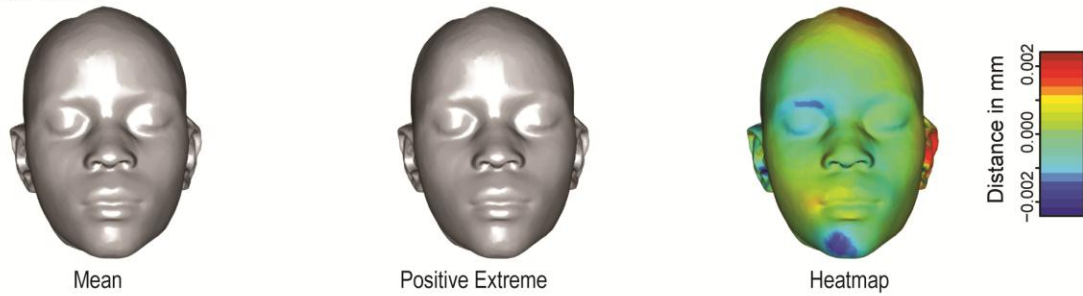

7 Skew PC1 (PC4)

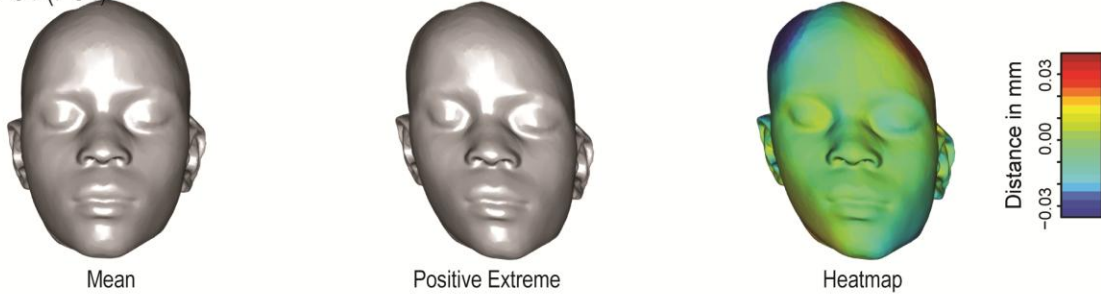

8. Skew PC2 (PC8)

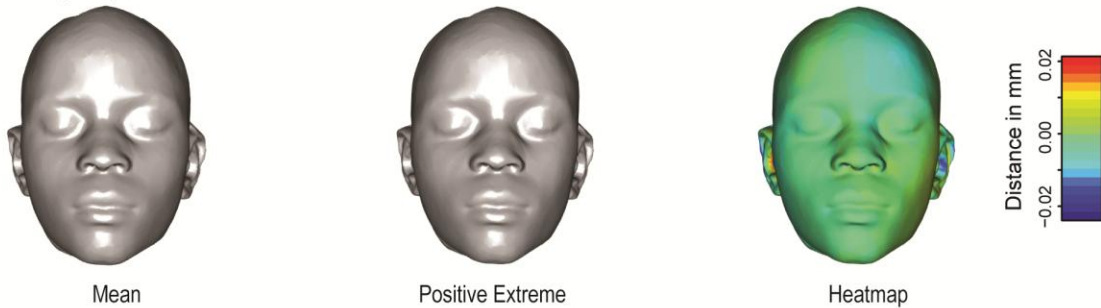

9. Skew PC3 (PC13)

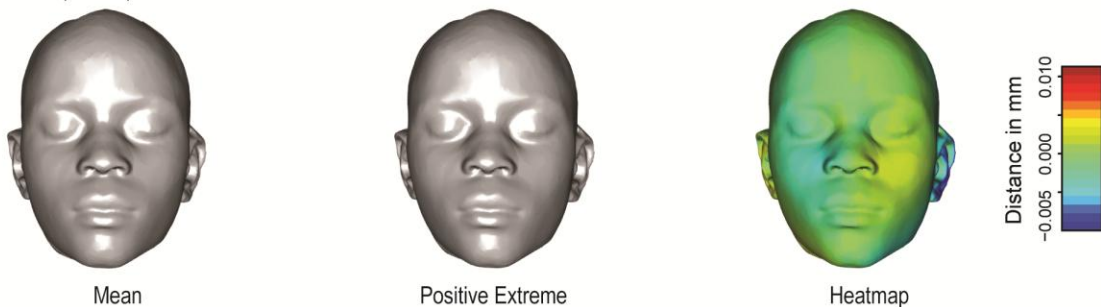

**Figure S2. Shape effects of artifacts and skew.** 3D morphs showing the effects of the variables for which corrections were applied in the analysis. For effects 1-5, the first column shows the mean shape for all individuals not affected by the artifact or factor. For effects 6-9, the mean shows the entire sample mean. The middle column for effects 1-5 shows the shape that corresponds to the most extreme shapes within the group affected by the artifact as determined using canonical variate analysis. For variables 6-9, the middle column shows the most extreme shapes associated with the principal component that captures that artifact in the entire sample. The third column shows heatmaps that correspond to the shape differences between the shapes in the first and second column. The heatmaps are scaled to the range of shape difference for each effect and so each is scaled differently. The scales are shown beside each heatmap.
