# Supplementary material
Source: PubMed Central journal article supplement (PMC5289863)
Supplement: 967FigureS3.pdf [file 967FigureS3.pdf]

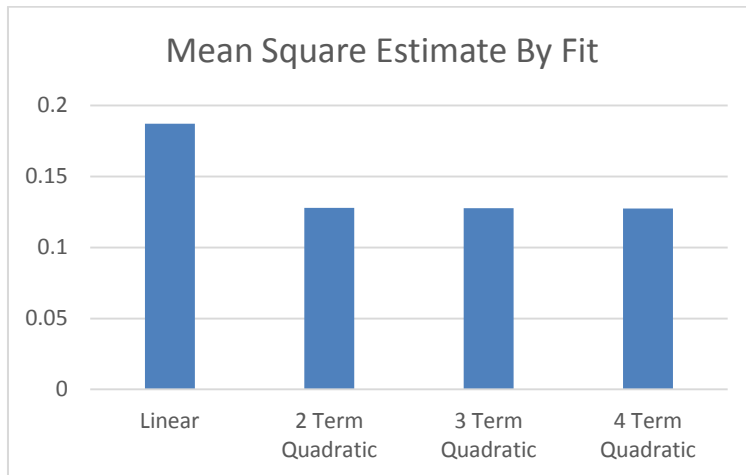

**Figure S3. Estimates of the variance (mean square) explained by age using linear and quadratic fits.**
