# Supplementary material
Source: PubMed Central journal article supplement (PMC5289863)
Supplement: 967FigureS4.pdf [file 967FigureS4.pdf]

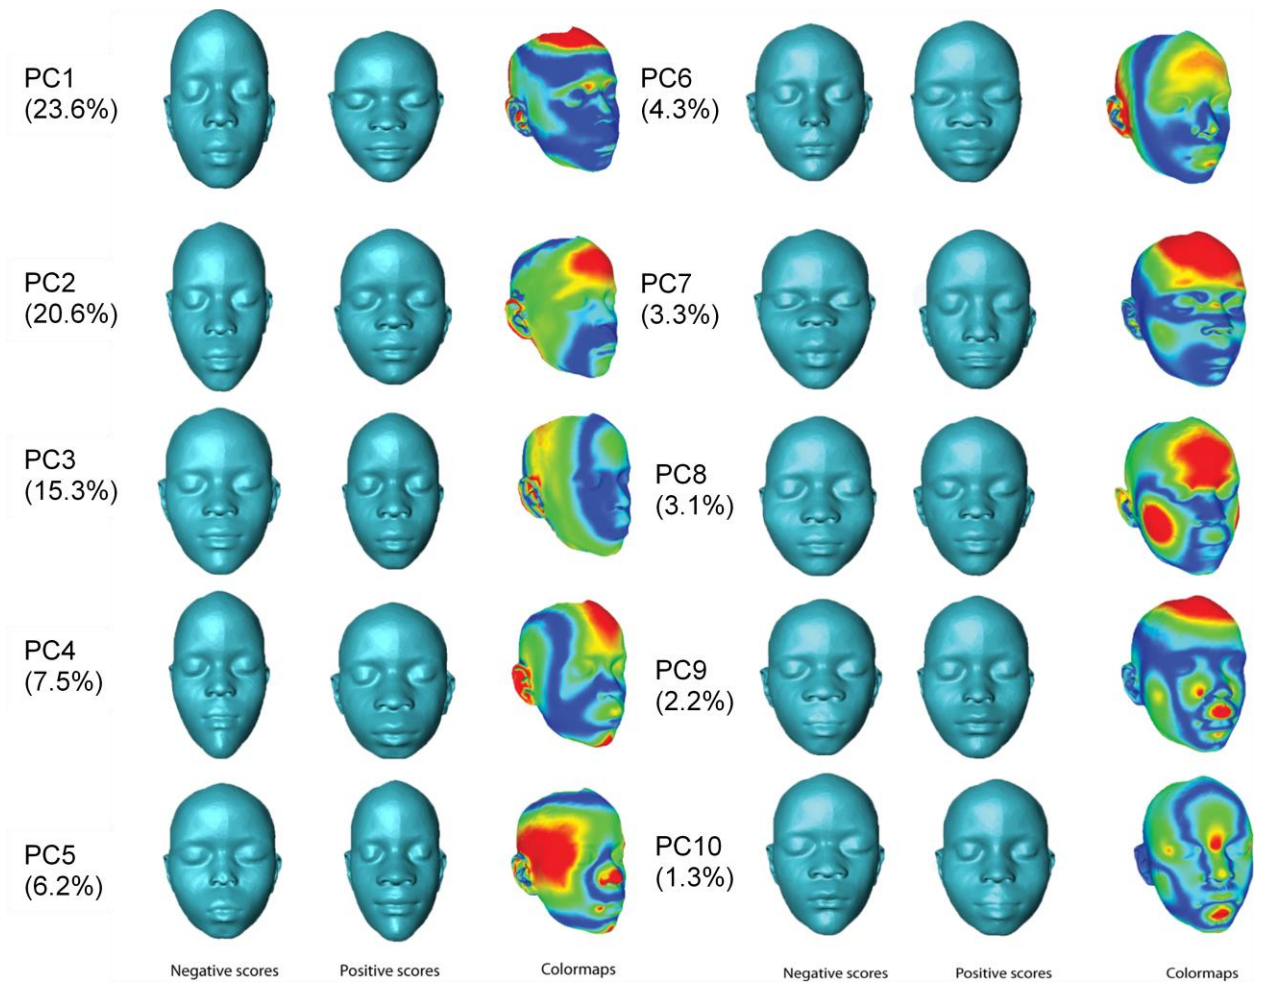

**Figure S4. 3D facial morphs and color maps of principal component phenotypes.**

Visual depiction of the extreme ends of PC1-PC10 scores with percent of phenotypic variance explained. The heatmaps depict the regions of the face that vary the most between the min and max morphs.
