# Supplementary material
Source: PubMed Central journal article supplement (PMC5289863)
Supplement: 967FigureS5.pdf [file 967FigureS5.pdf]

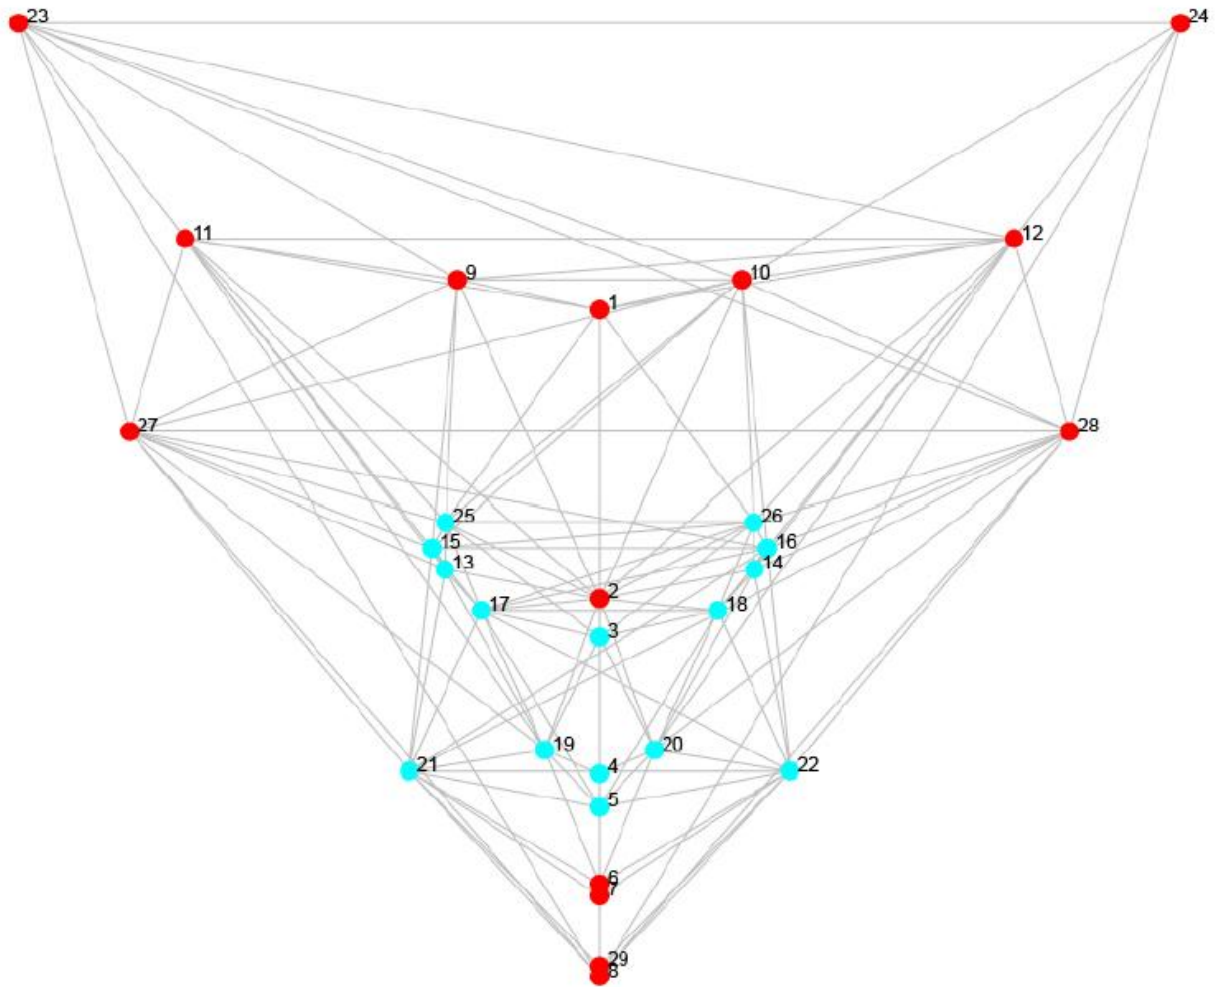

**Figure S5. Wireframe of correlated landmark set for deriving MidfaceModPC1 phenotype.** Landmark set with highest internal correlations and lowest correlations in which a principal components analysis was performed. The resulting first principal component is the MidfaceModPC1 phenotype. Landmarks, as depicted in Figure 1, are labeled here: LS (4), STO (5), AC\_R (13), AC\_L (14), AL\_R (15), AL\_L (16), SBAL\_R (17), SBAL\_L (18), CPH\_R (19), CPH\_L (20), CH\_R (21), CH\_L (22).
