# Supplementary material
Source: PubMed Central journal article supplement (PMC5289863)
Supplement: 967FigureS6.pdf [file 967FigureS6.pdf]

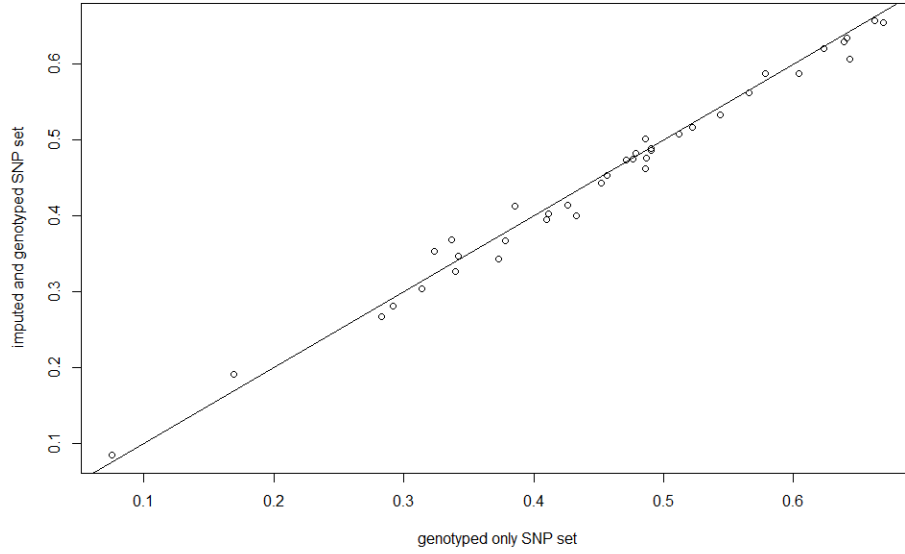

**Figure S6. Comparing the use of imputed vs. genotyped only SNP sets for heritability estimates.**  $h^2$  estimates were obtained using both the full dataset of imputed and genotyped SNPs vs. the genotyped only SNP set for each of 38 facial traits.
