# Supplementary material
Source: PubMed Central journal article supplement (PMC5289863)
Supplement: 967FigureS8.pdf [file 967FigureS8.pdf]

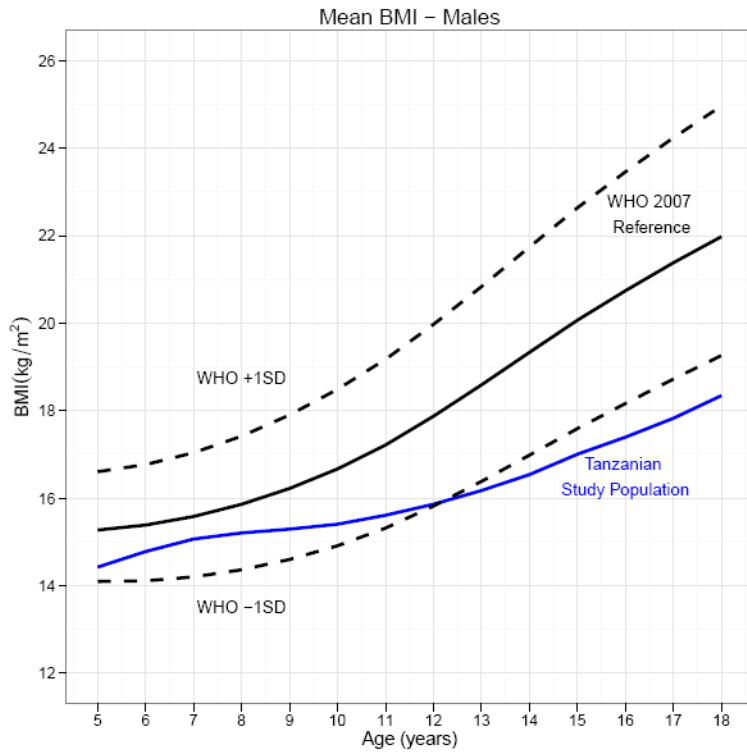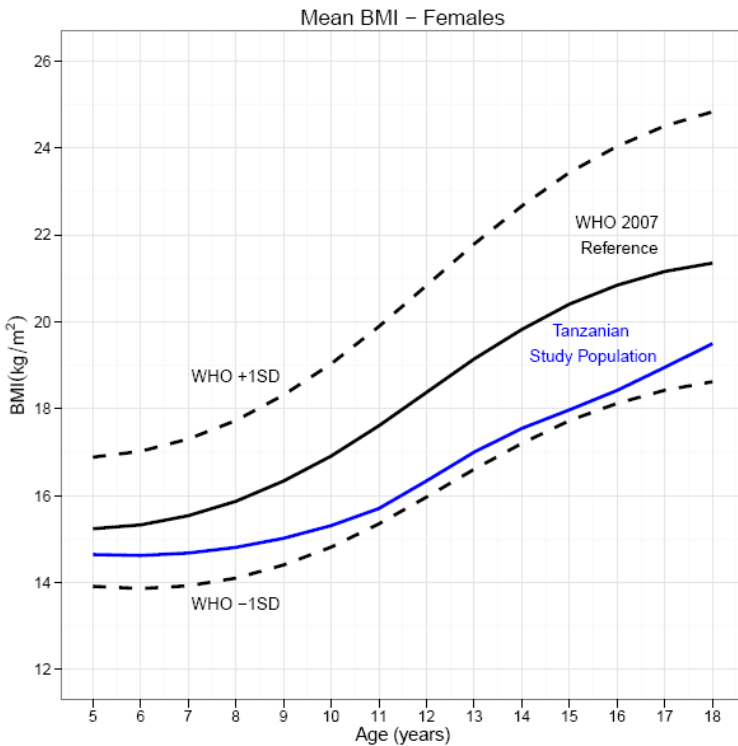

**Figure S8. Mean BMI for Tanzanian study population and WHO 2007 reference by sex.** Tanzanian Body Mass Index (BMI) was calculated from height and weight, and compared to the World Health Organization 2007 Reference means +/- 1 standard deviation for both males and females.
