# Supplementary material
Source: PubMed Central journal article supplement (PMC5289863)
Supplement: 967TableS1.pdf [file 967TableS1.pdf]

**Table S1. Landmark definitions.**

Abbreviations, names, and descriptions for each of the 29 landmarks and derived MEN landmark.

| Landmark Abbreviation | Landmark Name        | Description                                                                                                                                    |
|-----------------------|----------------------|------------------------------------------------------------------------------------------------------------------------------------------------|
| AC <sup>a</sup>       | Alar curvature point | Most posterolateral point on the alar cartilage, located within the crease formed by the union of the alar cartilage and the skin of the cheek |
| AL <sup>a</sup>       | Alare                | Most lateral point on the nasal ala                                                                                                            |
| CH <sup>a</sup>       | Chelion              | Point marking the lateral extent of the labial fissure                                                                                         |
| CPH <sup>a</sup>      | Crista philtri       | Point marking the lateral crest of the philtrum at the vermilion border of the upper lip                                                       |
| EN <sup>a</sup>       | Endocanthion         | Apex of the angle formed at the inner corner of the palpebral fissure where the upper and lower eyelids meet                                   |
| EX <sup>a</sup>       | Exocanthion          | Apex of the angle formed at the outer corner of the palpebral fissure where the upper and lower eyelids meet                                   |
| GN                    | Gnathion             | Midline point on the inferior border of the mandible                                                                                           |
| LI                    | Labiale inferius     | Midline point of the vermilion border of the lower lip                                                                                         |
| LS                    | Labiale superius     | Midline point of the vermilion border of the upper lip at the base of the philtrum                                                             |
| MEN                   | Midendocanthion      | Calculated as the midpoint between left and right EN landmark coordinates                                                                      |
| N                     | Nasion               | Midline point where the frontal and nasal bones contact (nasofrontal suture).                                                                  |
| P                     | Pogonion             | Most prominent portion of chin, anatomical pogonion                                                                                            |
| PRN                   | Pronasale            | Midline point marking the maximum protrusion of the nasal tip                                                                                  |
| SBAL <sup>a</sup>     | Subalare             | Point located at the lower margin of the nasal ala, where the cartilage inserts in the cutaneous upper lip                                     |
| SL                    | Sublabiale           | Midpoint along the inferior margin of the cutaneous lower lip (labiomental sulcus)                                                             |
| SN                    | Subnasale            | Midline point at the junction of the inferior border of the nasal septum and the cutaneous upper lip □ the apex of the nasolabial angle        |
| SPA <sup>a</sup>      | Superior alar groove | Most superior portion of alar groove.                                                                                                          |
| STO                   | Stomion              | Midpoint of the labial fissure                                                                                                                 |
| T <sup>a</sup>        | Tragion              | Point marking the notch at the superior margin of the tragus, where the cartilage meets the skin of the face                                   |
| Z <sup>a</sup>        | Zygion               | Most prominent portion of zygomatic arch                                                                                                       |

<sup>a</sup>bilateral landmarks
