# Supplementary material
Source: PubMed Central journal article supplement (PMC5289863)
Supplement: 967TableS2.pdf [file 967TableS2.pdf]

**Table S2. Means and standard deviations for all linear distances and centroid size.**  
 Multivariate measures are not included in this table as they are mean-centered around zero.

| <b>Facial Trait</b> | <b>Mean</b> | <b>Standard Deviation</b> |
|---------------------|-------------|---------------------------|
| AC_PRN              | 24.340      | 1.895                     |
| AL_R_AL_L           | 34.850      | 2.670                     |
| CH_R_CH_L           | 42.877      | 2.859                     |
| CPH_R_CPH_L         | 12.328      | 1.138                     |
| EN_EX               | 32.018      | 1.679                     |
| EN_R_EN_L           | 31.983      | 1.982                     |
| EX_R_EX_L           | 93.218      | 4.410                     |
| GN_T                | 125.879     | 7.597                     |
| LI_SL               | 10.730      | 1.311                     |
| LS_STO              | 9.011       | 1.016                     |
| N_GN                | 99.535      | 6.154                     |
| N_MEN               | 7.824       | 1.341                     |
| N_PRN               | 32.576      | 2.773                     |
| N_SN                | 40.018      | 3.114                     |
| N_STO               | 62.268      | 4.302                     |
| N_T                 | 106.623     | 5.180                     |
| SBAL_R_SBAL_L       | 26.697      | 1.883                     |
| SN_GN               | 62.595      | 3.990                     |
| SN_LS               | 15.789      | 1.484                     |
| SN_PRN              | 12.922      | 1.412                     |
| SN_STO              | 22.408      | 1.800                     |
| SN_T                | 113.194     | 6.141                     |
| STO_LI              | 9.748       | 1.165                     |
| STO_SL              | 18.014      | 1.673                     |
| T_R_T_L             | 130.554     | 5.851                     |
| Centroid Size       | 239.177     | 12.232                    |
